# Supplementary material for: Long-term changes in the thermodynamic structure of the lowermost stratosphere inferred from ERA5 reanalysis data
Source: Copernicus journal article supplement (doi:10.5194/egusphere-2024-1700), 2024-06-13
Supplement: Supplementary file [file egusphere-2024-1700-RC2-supplement.pdf]

# Tropical expansion measured by isentropic and potential vorticity fields and age of air

Juan A. Anhel<sup>1</sup>, Petr Šácha<sup>1</sup> and Laura de la Torre<sup>1</sup>

j.anhel@uvigo.es

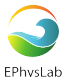

EPhysLab

UniversidadeVigo

<sup>1</sup>Ourense, Spain

## Some methods used to evaluate tropical width

- SSTs
- subtropical jet stream/barriers
- tropopause height - with 'artificial' thresholds -
- surface winds
- outgoing IR radiation - maximum at subtropics
- precipitation-evaporation difference
- $[O_3]$  change tropics-subtropics

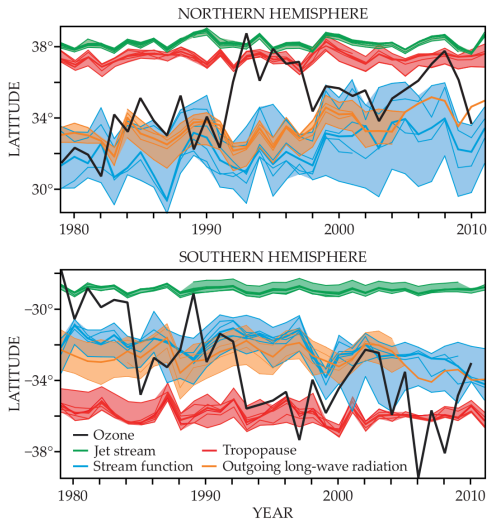

Birner et al.(2014) adapted from IPCC AR5

### Problems assessing tropical width

- Some methodologies can only be applied to a given subset
- Some variables are very poor from models limiting future projections
- Most of them depend on randomly chosen threshold values
- Tropical widening is a problem more complex than getting a single 2D perspective

## Global Distribution of Potential Vorticity at the tropopause level

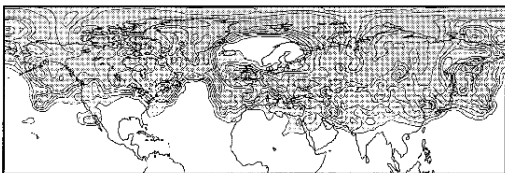

FIG. 1. Potential vorticity on the 320-K isentropic surface at 0000 GMT 15 February 1994, in lat-long projection for the Northern Hemisphere. Isolines are plotted every 1 PVU. Field produced by Dr. P van Velthoven, using analyzed data from the European Centre for Medium-Range Weather Forecasts.

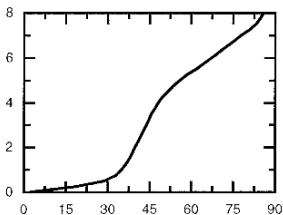

FIG. 2. Potential vorticity (in PVU) for the case of Fig. 1 plotted as a function of the area that is covered by potential vorticity values that are larger than the value at hand. Area is expressed as equivalent latitude, i.e., the latitude of a zonally symmetric contour enclosing the same area.

Ambaum M. (1997), Isentropic Formation of the Tropopause, *J. Atmos. Sci.*, 54, 555-568.

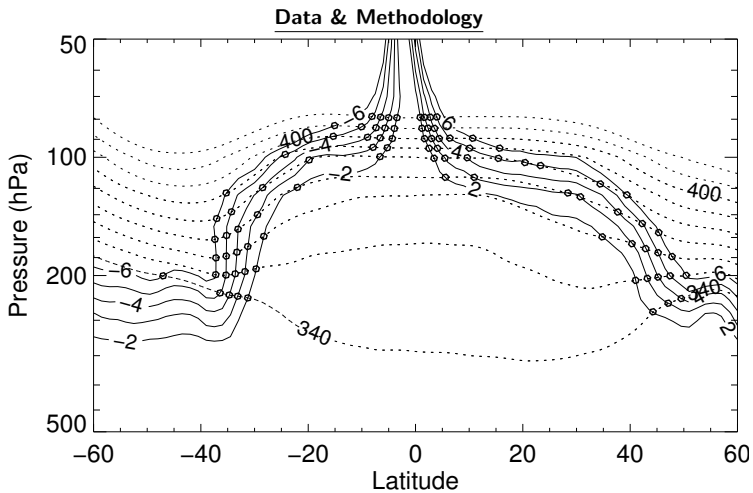

## Data & Methodology

- Analysis of the pressure levels between 500 and 50 hPa.
- Datasets used: WACCM, WACCM UTLS, ERA-INTERIM, JRA55, NCEP2, MERRA

|                    | <b>N levels 500-50 hPa</b> | <b>Horizontal grid</b> |
|--------------------|----------------------------|------------------------|
| <b>WACCM</b>       | 14                         | 1.9×2.5                |
| <b>WACCM UTLS</b>  | 40                         | 1.9×2.5                |
| <b>ERA-INTERIM</b> | 14                         | 0.5×0.5                |
| <b>JRA55</b>       | 14                         | 1.25×1.25              |
| <b>MERRA</b>       | 11                         | 1.25×1.25              |
| <b>NCEP2</b>       | 9                          | 2.5×2.5                |

## Data & Methodology

- $\theta$  is computed for each grid point

$$\theta(\lambda, \phi, p, t) = T(\lambda, \phi, p, t) \cdot (p_0/p)^{(R/c_p)}$$

- $u$ ,  $v$  and  $z$  fields are interpolated to the  $\theta$  levels interesting for our study (from 340K to 420K)
- the isentropic relative vorticity of the air  $\xi_\theta$  is computed
- then we have the absolute vorticity
- $d\theta/dp$  is computed and then interpolated to isentropic levels.
- PV is computed

$$PV(\lambda, \phi, \theta, t) = -g \cdot (\xi_\theta + f) \cdot (d\theta/dp)$$

- the PV field is interpolated to the desired values (1.6, 2, 3, 3.5, 4, 5, 6 PVU and the subsequent for the Southern Hemisphere).
- $\phi_e$  is computed



## Equivalent latitude

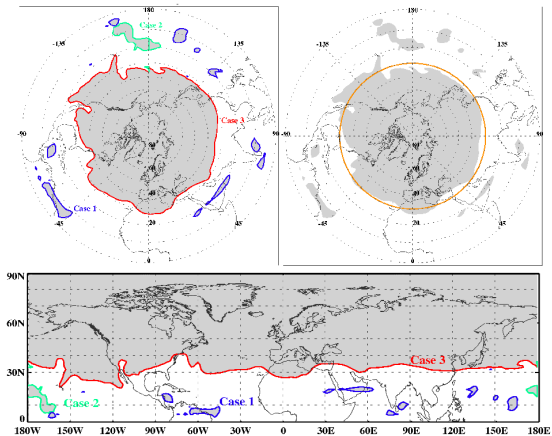

Añel et al. (2013) Equivalent Latitude Computation Using Regions of Interest (ROI).  
PLoS ONE 8(9): e72970

Period of study:

WACCM — 1979-2006

WACCM-UTLS — 1979-2006

ERA-INTERIM — 1979-2013

JRA55 — 1979-2013

MERRA — 1979-2013

NCEP2 — 1979-2013

$\phi_e$  trend (degrees/decade) averaged for 340 K, 350 K and 360 K. Positive trends: northward displacement; negative trends: southward displacements

|      | WACCM        | WACCM-UTLS | ERA-Interim | MERRA      | NCEP2      | JRA-55     |
|------|--------------|------------|-------------|------------|------------|------------|
| -6.0 | -0,27 ± 0,11 | -0.04±0,17 | -0.17±0,14  | 0.02±0,13  | 0.72±0,12  | 0.06±0,16  |
| -5.0 | -0,27 ± 0,09 | 0.00±0,17  | 0.08±0,11   | 0.14±0,10  | 0.66±0,10  | 0.15±0,11  |
| -4.0 | -0,24 ± 0,08 | 0.05±0,18  | -0.04±0,11  | -0.21±0,07 | -0.04±0,05 | -0.05±0,06 |
| -3.5 | -0,23 ± 0,08 | 0.06±0,18  | 0.19±0,16   | 0.09±0,08  | 0.87±0,11  | 0.15±0,11  |
| -3.0 | -0,21 ± 0,09 | 0.05±0,17  | -0.04±0,08  | 0.00±0,04  | -0.84±0,10 | -0.19±0,08 |
| -2.0 | -0,24 ± 0,10 | -0.01±0,18 | 0.00±0,08   | 0.06±0,05  | -0.41±0,08 | -0.05±0,09 |
| -1.6 | -0,29 ± 0,12 | -0.08±0,21 | 0.04±0,10   | 0.16±0,07  | -0.16±0,08 | 0.05±0,09  |
| 1.6  | 0,38 ± 0,13  | 0.25±0,17  | 0.41±0,12   | 0.45±0,12  | -0.01±0,09 | 0.23±0,09  |
| 2.0  | 0,31 ± 0,11  | 0.23±0,15  | -0.27±0,15  | 0.05±0,14  | 0.76±0,12  | 0.00±0,14  |
| 3.0  | 0,19 ± 0,09  | 0.13±0,11  | 0.13±0,09   | 0.02±0,09  | 0.47±0,10  | 0.10±0,09  |
| 3.5  | 0,15 ± 0,08  | 0.10±0,10  | -0.43±0,15  | -0.27±0,09 | 0.10±0,07  | -0.20±0,10 |
| 4.0  | 0,12 ± 0,08  | 0.06±0,09  | -0.04±0,13  | 0.01±0,08  | 0.59±0,07  | -0.02±0,07 |
| 5.0  | 0,17 ± 0,09  | 0.03±0,10  | -0.10±0,06  | 0.03±0,04  | -0.60±0,08 | -0.17±0,06 |
| 6.0  | 0,23 ± 0,12  | 0.05±0,12  | 0.04±0,08   | 0.17±0,05  | -0.19±0,07 | 0.02±0,07  |



## WACCM REF B2

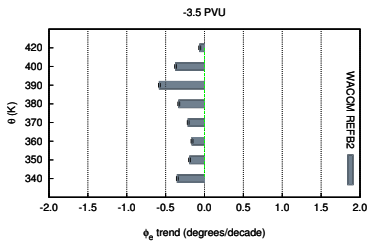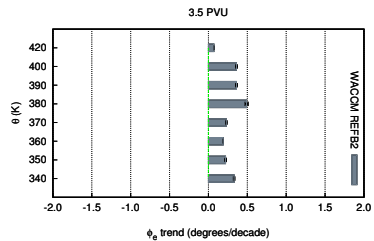

## Number of days with AoA < mean value for 1979-2009. Source: CMAM

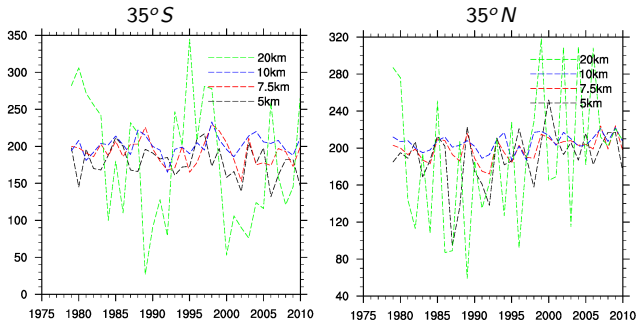

Period: 1979-2009. Source: CMAM

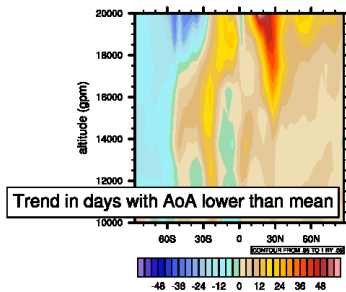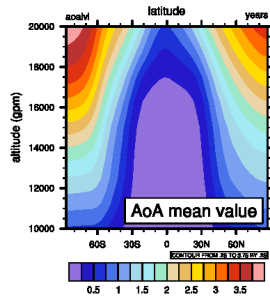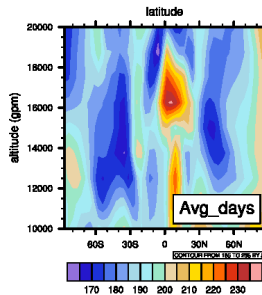

## Conclusions

- WACCM gives a clear poleward signal of the movement of the PV field
- Reanalysis give contradictory signals in several cases, but mostly agree for the isentropic levels closer to the tropopause
- The competing phenomena of tropopause rising vs broadening is clear.
- At UTLS levels the latitudinal gradient of AoA seems clear and average days under the mean could be an useful fingerprint
